# Supplementary material for: Endothelial transplantation rejuvenates aged hematopoietic stem cell function
Source: JCI journal article supplement (doi:10.1172/jci93940), 2017-10-15
Supplement: sd1 [file 1]

## Supplemental Material

Poulos et. al.

### Endothelial transplantation rejuvenates aged hematopoietic stem cell function

#### Supplemental Figures and Legends

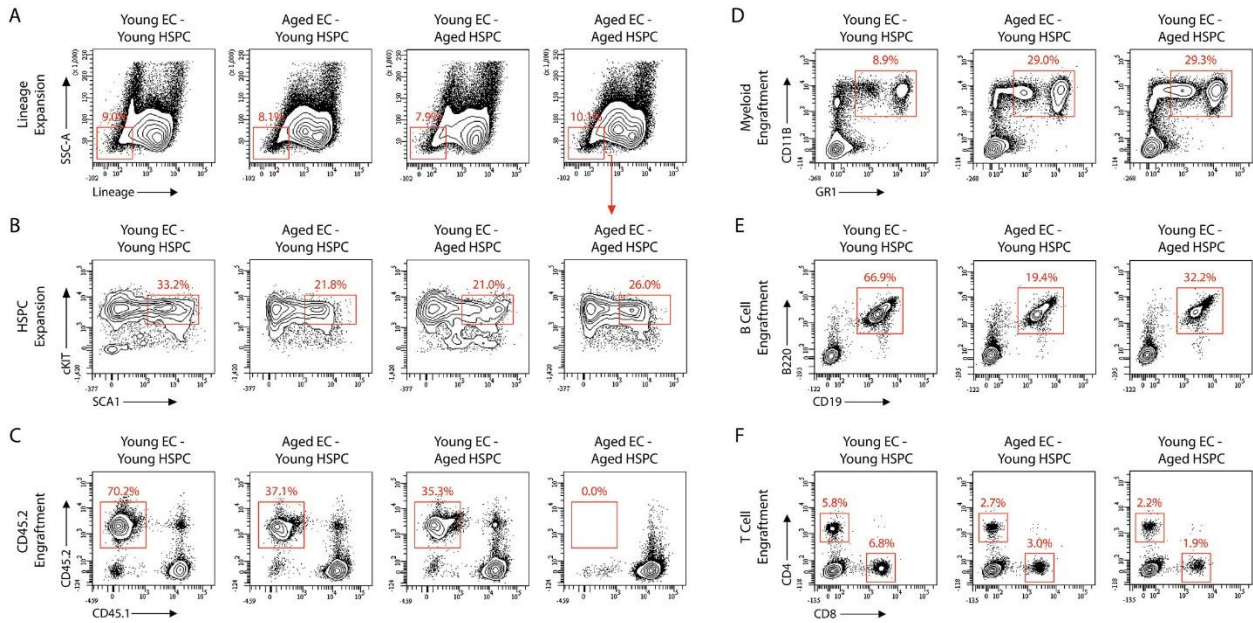

**Supplemental Figure 1. Representative contour plots of hematopoietic expansion and multi-lineage engraftment.** (A-B) Hematopoietic populations following 14 days of expansion on endothelial cells (ECs). Hematopoietic populations were enriched using CD45 microbeads following expansion. (A) Lineage<sup>-</sup> (GR1<sup>-</sup>CD11B<sup>-</sup>B220<sup>-</sup>CD3<sup>-</sup>CD41<sup>-</sup>TER119<sup>-</sup>) cell populations. Red box/arrow indicates gating strategy for phenotypic hematopoietic stem and progenitor cells (HSPCs). (B) Phenotypic lineage<sup>-</sup>cKIT<sup>+</sup>SCA1<sup>+</sup> (LKS) HSPCs (red box). Lineage<sup>-</sup>cKIT<sup>+</sup>SCA1<sup>High</sup> populations are indicated (dashed blue box). (C-F) Long-term multi-lineage reconstitution of HSPC/EC *ex vivo* expansions four months post-transplantation. (C) Representative plots of CD45.2<sup>+</sup>CD45.1<sup>-</sup> peripheral blood hematopoietic engraftment. All engraftment plots were gated on TER119<sup>-</sup> cell populations. (D) Representative plots of GR1<sup>+</sup>CD11B<sup>+</sup> myeloid cell, (E) B220<sup>+</sup>CD19<sup>+</sup> B Cell, and (F) CD8<sup>+</sup>/CD4<sup>+</sup> T Cell reconstitution. All multi-lineage plots were gated on total CD45.2<sup>+</sup> cell populations.

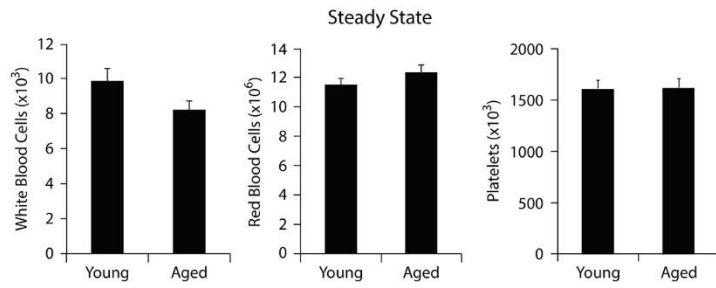

**Supplemental Figure 2. Complete blood counts of young and aged control mice.** Steady state (pre-irradiation) young (3 month) and aged (24 month) C57BL/6 mice were bled and analyzed for peripheral blood counts (n = 5). Results demonstrate no observable differences between pre-irradiation young or aged animals. Unpaired two-tailed Student's t-tests were performed to determine significance (\* P<0.05; \*\* P<0.01; \*\*\* P<0.001).

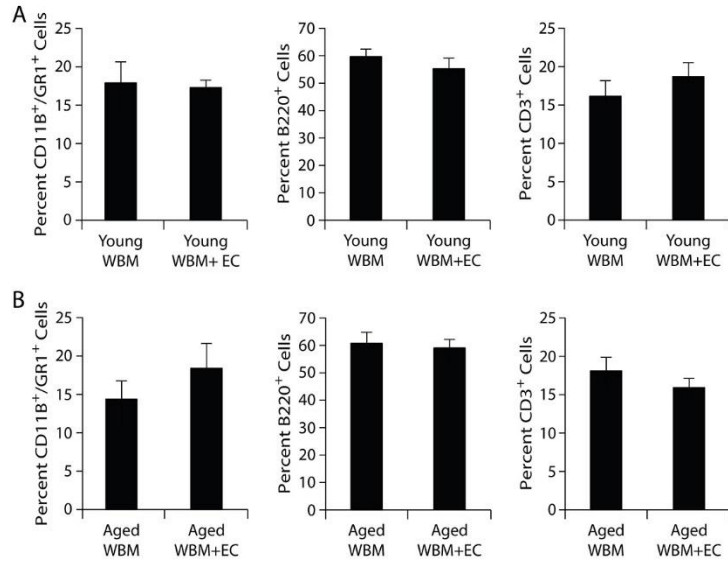

**Supplemental Figure 3. Multi-lineage reconstitution of WBM-EC co-infused animals.** (A-B) Whole bone marrow ( $10^5$  cells) from (A) young (3 month) or (B) aged (24 month) C57BL/6 mice were co-infused with or without  $5 \times 10^5$  young endothelial cells (ECs) in a non-competitive setting following lethal total body irradiation (950 Rads). Surviving mice were assessed for multi-lineage reconstitution four months post-TBI (n = 10 mice/cohort). Unpaired two-tailed Student's t-tests were performed to determine significance (\* P<0.05; \*\* P<0.01; \*\*\* P<0.001).

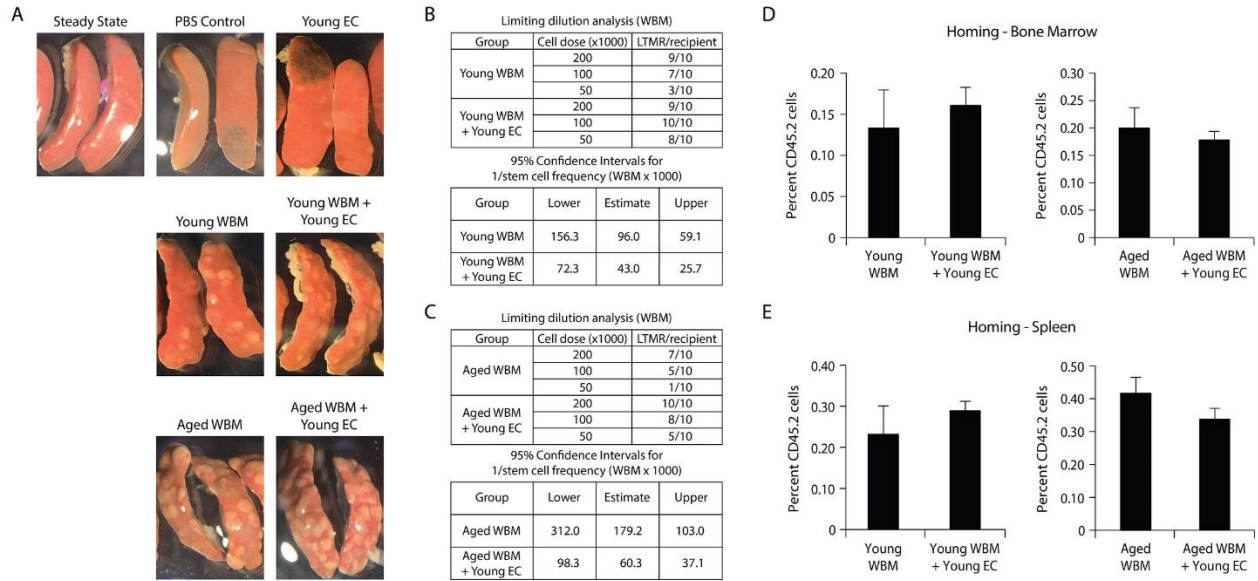

**Supplemental Figure 4. Co-infusion of young endothelium supports HSPC activity.** Whole bone marrow (WBM) from young (3 month) and aged (24 month) C57BL/6 mice were co-infused with or without  $5 \times 10^5$  young endothelial cells (ECs) into lethally-irradiated recipients (950 Rads) and assessed for hematopoietic stem and progenitor activity. **(A)** Representative images of colony-forming units-spleen (CFU-S) in mice eight days following transplantation with  $10^5$  WBM with or without young ECs. **(B-C)** Limiting dilution data displaying the frequency of long-term multilineage reconstitution (LTMR) of non-competitive WBM transplantations from **(B)** young and **(C)** aged mice ( $n = 10$  mice/cohort). Stem cell frequency and 95% confidence intervals were determined using Extreme Limiting Dilution Analysis (ELDA). **(D-E)** Hematopoietic homing analysis of  $10^6$  young and aged CD45.2<sup>+</sup> WBM with and without  $5 \times 10^5$  young ECs infused/co-infused in lethally-irradiated (950 Rads) recipients. Data demonstrates no observable differences between hematopoietic homing in the **(D)** bone marrow or **(E)** spleen 16 hours post-infusion. Unpaired two-tailed Student's t-tests were performed to determine significance (\*  $P < 0.05$ ; \*\*  $P < 0.01$ ; \*\*\*  $P < 0.001$ ).

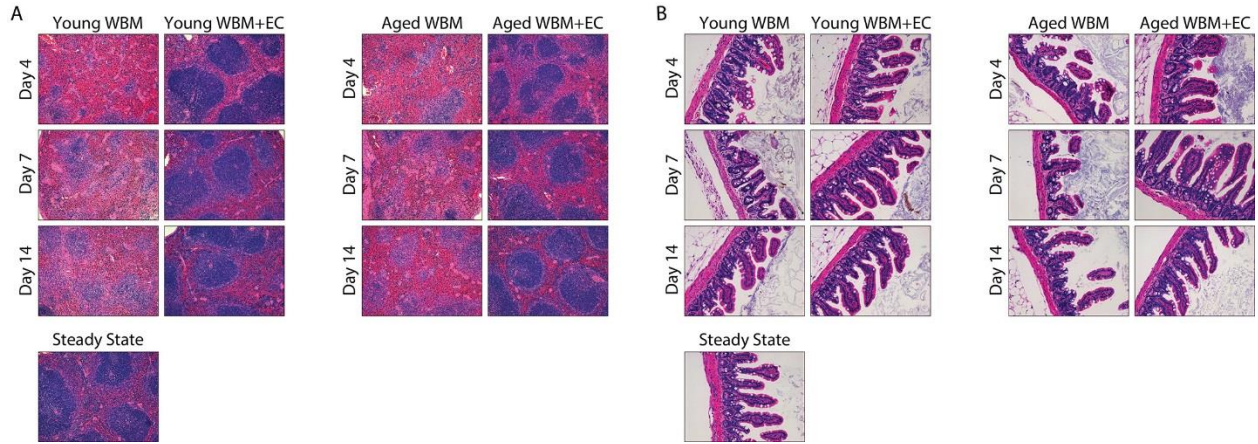

**Supplemental Figure 5. Endothelial cell co-infusion safeguards radiosensitive tissues.** Following a lethal dose of total body irradiation (950 Rads), C57BL/6 mice infused with a single dose of young (3 month) or aged (24 month) whole bone marrow with or without  $5 \times 10^5$  young endothelial cells (ECs) and assessed for tissue damage. Representative Hematoxylin and Eosin (H&E) stained sections demonstrate distinct radioprotection of both (A) spleen and (B) intestine tissue morphology in EC co-infused groups (n = 10 mice/cohort; 100X and 200X magnification, respectively).

| <b>Gene</b>   | <b>Primer Bank ID</b> | <b>Fwd Primer (5'-3')</b> | <b>Rev Primer (5'-3')</b> |
|---------------|-----------------------|---------------------------|---------------------------|
| <i>Vcam1</i>  | 26326181a1            | gttcagcgagggtctacc        | aactcttggcaaacattaggtgt   |
| <i>Sele</i>   | 6755452a1             | atgcctcgcgctttctctc       | gtagtcccgctgacagtatgc     |
| <i>Kitl</i>   | 198596a1              | gaatctccgaagaggccagaa     | gctgcaacaggggtaacat       |
| <i>Cxcl12</i> | 7305465a1             | tgcacagtgacggtaacca       | ttcttcagccgtgcaacaatc     |
| <i>Jag1</i>   | 7305197a1             | cctcgggtcagttgagctg       | ccttgaggcacactttgaagta    |
| <i>Jag2</i>   | 21553297a1            | caatgacaccactccagatgag    | ggccaaagacgtcgttgccg      |
| <i>Dll1</i>   | 164565442c2           | cccatccgattccccttcg       | ggttttctgttgcgaggtcatc    |
| <i>Dll4</i>   | 9506547a1             | ttcaggcaaccttctccga       | actgccgctattcttgtccc      |
| <i>Igfbp3</i> | 6680385a1             | ccaggaacatcagtgagtcc      | ggatgggaacttggaaatcggca   |
| <i>Csf1</i>   | 166064045c1           | gtgtcagaacctgtagccac      | tcaaaggcaatctggcatgaag    |
| <i>Il6</i>    | 13624311a1            | tagtccttctacccaatttcc     | ttggtccttagccactccttc     |
| <i>Actb</i>   | In-house              | cgtgcgtgacatcaaagagaa     | ggccatctctgctcgaa         |

**Supplemental Table 1. Primer sets used for young and aged endothelial gene expression analysis.**
